# Supplementary material
Source: PubMed Central journal article supplement (PMC6002304)
Supplement: 12687_2017_352_MOESM1_ESM.pdf [file 12687_2017_352_MOESM1_ESM.pdf]

## Interview Schedule (Semi-structured)

### Introduction / Demographic

- Could you tell me about your family? (i.e. siblings, parents, spouse, children)

### Open-ended Questions:

#### About the condition and receiving the diagnosis

- Can you tell me more about how you were diagnosed with your cardiac condition?  
Prompts:
  - When were you first diagnosed? (How long ago? How old were you?)
  - Did you have any prior symptoms?
  - What prompted you to see a doctor?
- Do you remember when you received the diagnosis? Can you tell me more?  
Prompts:
  - Who was with you when you received the diagnosis?
  - Who gave you the diagnosis? *i.e. Doctor, nurse, etc*
  - How did you feel at that point in time?
- Were there any specific issues that were raised when you were given the diagnosis?  
*i.e. lifestyle changes, the need to inform family, the need for other interventions/management methods*
- What was your immediate concern / worry?
- Is there anything you would have liked to be done differently when you were given the diagnosis?
- Do you have any positive memories around the time of receiving your diagnosis? Were there any aspects about the way the healthcare team treated you that were helpful?

#### Communication with family regarding diagnosis

- Have you spoken to your family members about the diagnosis of your condition?  
*(i.e. extended family: aunts, uncles, cousins)*  
Prompts:
  - Individually / together?
  - Who did you tell in your family? How did you tell them?
  - Why did you tell these family members and not others?
- Do you think this is important information to know?
  - Important & told
  - Important but don't know how to tell
  - Not important
- How was your experience of sharing this information with them?
- What information did you tell them about your condition?
- What is their understanding about their risk?
- What made you want to tell / not tell them about it?  
Prompts:
  - Did other members of the family have similar symptoms?
- *(if they have not shared information)* Do you think there would be a situation where you would tell your siblings (i.e. if the experienced cardiac problems / if they had another illness)  
Prompts:
  - If it was your sibling who was diagnosed, would he/she tell? Would you want to know?
- *(if they have shared the information)* Now that you have told them, what do you think they will do with this information?  
Prompts:
  - Have they scheduled appointments to get their heart checked?

#### Any other issues

- Do you see genes as having a role in developing health problems?
- Are there any other aspects of your experience that you feel are important but have not been discussed?
